# Supplementary material for: A Validated Method for the Determination of Carnosic Acid and Carnosol in the Fresh Foliage of Salvia rosmarinus and Salvia officinalis from Greece
Source: MDPI journal article supplement (doi:10.3390/plants11223106), 2022-11-15
Supplement: s1 [file s1]

## SUPPLEMENTARY DATA

### A Validated Method for the Determination of Carnosic Acid and Carnosol in the Fresh Foliage of *Salvia rosmarinus* and *Salvia officinalis* from Greece

Charikleia Paloukopoulos and Anastasia Karioti \*

Laboratory of Pharmacognosy, School of Pharmacy, Aristotle University of Thessaloniki, University Campus,  
54124 Thessaloniki, Greece

**Table S1.** Extraction yield of carnosic acid and carnosol expressed as µg/g (fresh weight) in the samples of *S. rosmarinus* in different solvent in three individual extractions of the same sample.

| Extraction solvent | Carnosic acid (µg/g FWT)<br>(%RSD) | Carnosol (µg/g FWT)<br>(%RSD) |
|--------------------|------------------------------------|-------------------------------|
| Methanol           | 7314.21 ± 445.03<br>(6.08)         | 4345.93 ± 431.29<br>(9.92)    |
| Ethanol 96%        | 6531.21 ± 1102.41<br>(16.88)       | 2725.35 ± 492.59<br>(18.07)   |
| Acetone            | 7913.33 ± 275.79<br>(3.49)         | 2843.31 ± 3.33<br>(1.17)      |

**Table S2.** Accuracy data of the HPLC method at three concentration levels based on carnosic acid and carnosol.

| Compound             | Found (µg) | Added (µg) | Recovery (%) | RSD (% , n = 3) |
|----------------------|------------|------------|--------------|-----------------|
| <b>carnosic acid</b> |            |            |              |                 |
| High                 | 0.389      | 0.410      | 94.5         | 1.82            |
| Medium               | 0.209      | 0.205      | 101.8        | 0.46            |
| Low                  | 0.108      | 0.103      | 105.3        | 3.28            |
| <b>carnosol</b>      |            |            |              |                 |
| High                 | 0.068      | 0.064      | 105.8        | 0.49            |
| Medium               | 0.031      | 0.032      | 97.0         | 1.88            |
| Low                  | 0.015      | 0.016      | 98.9         | 4.74            |

**Table S3.** Accuracy data of the overall method based on carnosic acid and carnosol.

| Compound             | Found (µg) | Added (µg) | Recovery (%) | RSD (% , n=3) |
|----------------------|------------|------------|--------------|---------------|
| <b>carnosic acid</b> |            |            |              |               |
| High                 | 0.26694    | 0.26292    | 101.5        | 4.74          |
| Medium               | 0.12587    | 0.13145    | 95.8         | 2.61          |
| Low                  | 0.05591    | 0.06573    | 85.1         | 3.69          |
| <b>carnosol</b>      |            |            |              |               |
| High                 | 0.156      | 0.150      | 103.9        | 3.65          |
| Medium               | 0.0752     | 0.0750     | 100.3        | 4.20          |
| Low                  | 0.0392     | 0.0375     | 104.6        | 0.62          |

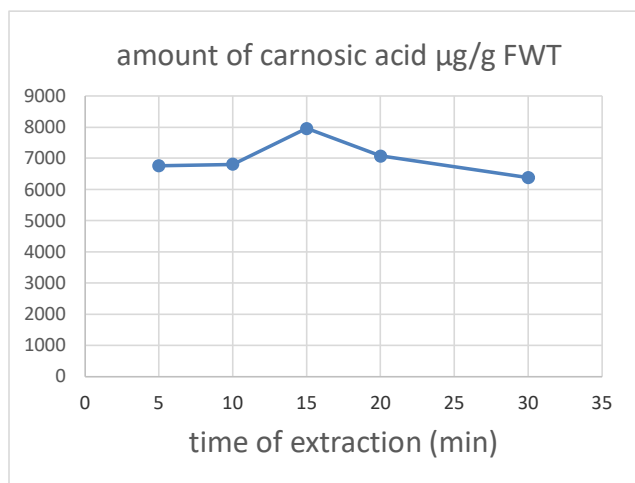

**Figure S1.** Optimization of extraction time.

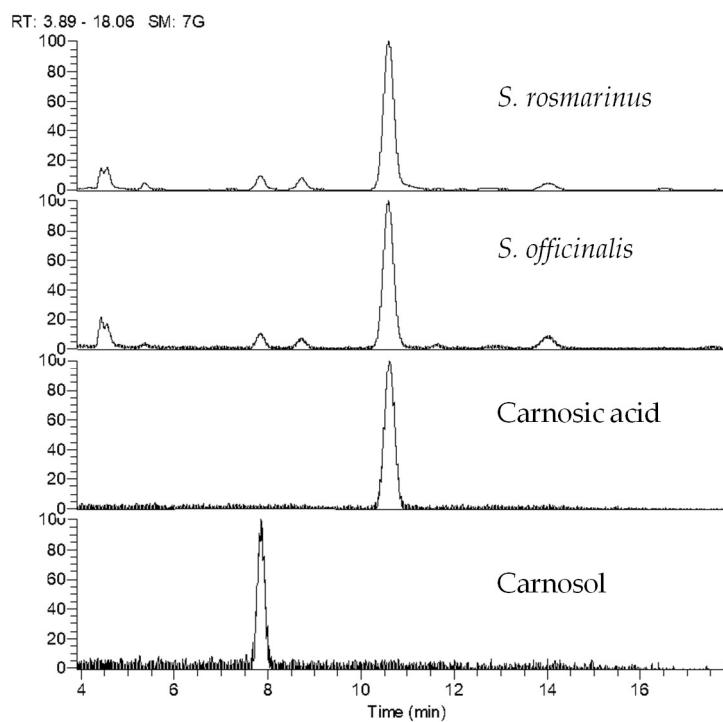

**Figure S2.** Representative chromatogram of rosemary and sage leaf extracts, carnosic acid and carnosol at 280 nm.
